# Supplementary material for: Impact of Transition Metal Doping on the Optical Characteristics of Se-Te Thin Film
Source: Research Square preprint supplement (doi:10.21203/rs.3.rs-6330559/v1), 2025-04-24
Supplement: Supplementary file 1 [file d18eb32c59e52aab05f5c595.docx]

**Highlights (for review)**

- Transition metal doping induces a blue shift in the absorption spectrum.
- The Wemple-DiDomenico model confirms the doping effect on dispersion and oscillator energies.
- Increase in nonlinear optical susceptibility supports advanced photonic applications.
- Urbach energy rises with transition metal doping.
